# Supplementary material for: Review of different methods and techniques used for flood vulnerability analysis
Source: Copernicus journal article supplement (doi:10.5194/nhess-2020-297), 2020-10-13
Supplement: Supplementary file [file nhess-2020-297-AC2-supplement.pdf]

| Anonymous Referee #2 |                                                                                                                                                                                                                         |                                                                                                                                                                                                                                                                                                                            |
|----------------------|-------------------------------------------------------------------------------------------------------------------------------------------------------------------------------------------------------------------------|----------------------------------------------------------------------------------------------------------------------------------------------------------------------------------------------------------------------------------------------------------------------------------------------------------------------------|
|                      | Comments                                                                                                                                                                                                                | Response                                                                                                                                                                                                                                                                                                                   |
| 1                    | In chapter 2 for example "flood vulnerability" and "integrated flood vulnerability" is defined as a sub-category of flood vulnerability, which I found confusing.                                                       | In the present review paper, we have just presented the different forms of vulnerability as floating in the research community, and the same was explained in Figure 2. We have not provided any definition of vulnerability or definition of the other terms associated with the study of flood vulnerability of our own. |
| 2                    | In Table 3 for example the authors define risk as a function of hazard and vulnerability, while the widely agreed concept used by the IPCC and others define hazard as a function of hazard, exposure and vulnerability | The different definition mentioned and explained in Table 3 is the opinion of various researchers and scientists worldwide. Since the present paper is a review paper, it is necessary to incorporate the vision of different researchers in the paper.                                                                    |
| 3                    | In the second part of the introduction chapter new terms are introduced but often they are not clearly defined and used in an ambiguous way.                                                                            | A per the authors' opinion, there is no new term used in this section. We only elaborated the different concepts used by various researchers in our own words for easy transfer of knowledge.                                                                                                                              |
| 4                    | The manuscript would also benefit from a thorough proofreading and copyediting process as there are several grammar and spelling mistakes throughout the manuscript.                                                    | The manuscript has been revised and tried to minimize grammatical errors.                                                                                                                                                                                                                                                  |
| 5                    | L59: "75 lakh hectares": please provide numbers in SI units                                                                                                                                                             | The manuscript has been corrected, and it is now presented in SI units.                                                                                                                                                                                                                                                    |
| 6                    | Fig 1: Please provide source for data also in the caption of the figure                                                                                                                                                 | The source of the data is provided in the figure 3.                                                                                                                                                                                                                                                                        |
| 7                    | L 169: "infra": this term is used multiple times in the manuscript. I am assuming it is an abbreviation for "infrastructure" but that should be clarified.                                                              | We appreciate the observation of the reviewer. A list of abbreviations is included in the manuscript.                                                                                                                                                                                                                      |
| 8                    | Chapter 3.2 and Figure 4: I do not understand what the distinction between different countries/region is supposed to tell us? Is it about the                                                                           | Yes, it is about the region/countries in which case studies have been conducted. The objective is to provide a rough idea                                                                                                                                                                                                  |

|                                                                                                              |                                                                         |
|--------------------------------------------------------------------------------------------------------------|-------------------------------------------------------------------------|
| region/countries in which case studies have been conducted in or the origin of the authors of those studies? | about the research activities going on in different parts of the world. |
|--------------------------------------------------------------------------------------------------------------|-------------------------------------------------------------------------|
